# Supplementary material for: Multi-arm star-branched polymer as an efficient contrast agent for tumor-targeted magnetic resonance imaging
Source: Royal Society of Chemistry journal article supplement (doi:10.1039/c7tb01202k), 2017-01-01
Supplement: c7tb01202k1.pdf [file c7tb01202k1.pdf]

Electronic Supplementary Information

# Multi-arms Star-branched Polymer as Efficient Contrast Agent for Tumor-targeted Magnetic Resonance Imaging

*Guangyue Zu<sup>a,b,#</sup>, Ye Kuang<sup>a,#</sup>, Jingjin Dong<sup>a</sup>, Yi Cao<sup>a</sup>, Kewei Wang<sup>a</sup>, Min Liu<sup>\*a</sup>,*

*Liqiang Luo<sup>b</sup> and Renjun Pei<sup>\*a</sup>*

<sup>a</sup> CAS Key Laboratory of Nano-Bio Interface, Division of Nanobiomedicine, Suzhou Institute of Nano-Tech and Nano-Bionics, Chinese Academy of Sciences, Suzhou 215123, China. \*E-mail: [rjpei2011@sinano.ac.cn](mailto:rjpei2011@sinano.ac.cn).

<sup>b</sup> Department of Chemistry, College of Sciences, Shanghai University, Shanghai 200444, China.

<sup>#</sup> These authors contribute equally.

<sup>†</sup> Electronic supplementary information (ESI) available: <sup>1</sup>H NMR spectra, UV-vis absorption spectra, FT-IR absorption spectra and *T*<sub>1</sub>-weighted MR images of cells.

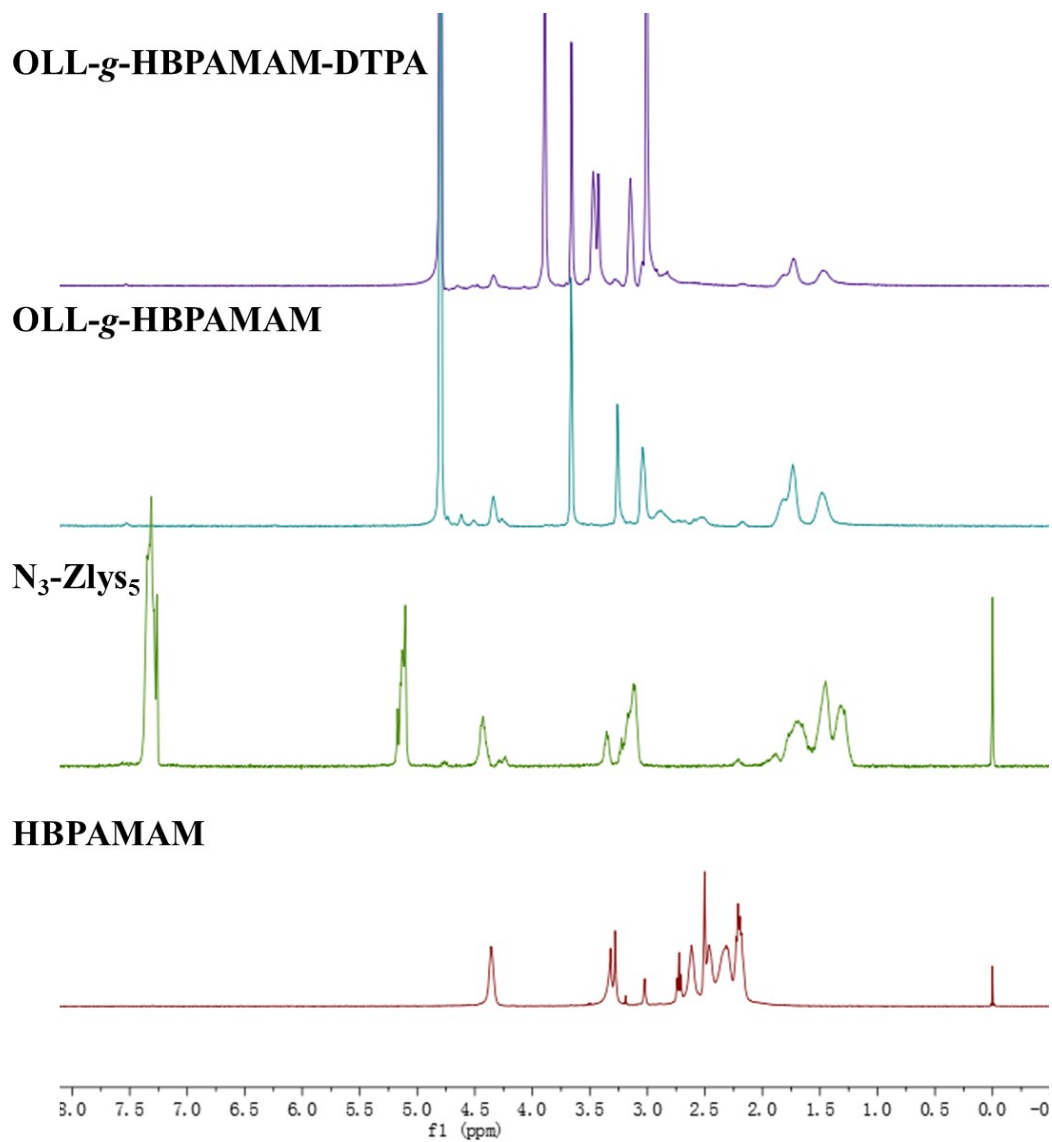

**Figure S1.** <sup>1</sup>H NMR spectra of alkynyl terminated HBPAMAM (recorded in DMSO-d<sub>6</sub>), N<sub>3</sub>-ZLys<sub>5</sub> (recorded in CDCl<sub>3</sub> + 15% Trifluoroacetic acid-d), OLL-g-HBPAMAM (recorded in D<sub>2</sub>O), OLL-g-HBPAMAM-DTPA (recorded in D<sub>2</sub>O).

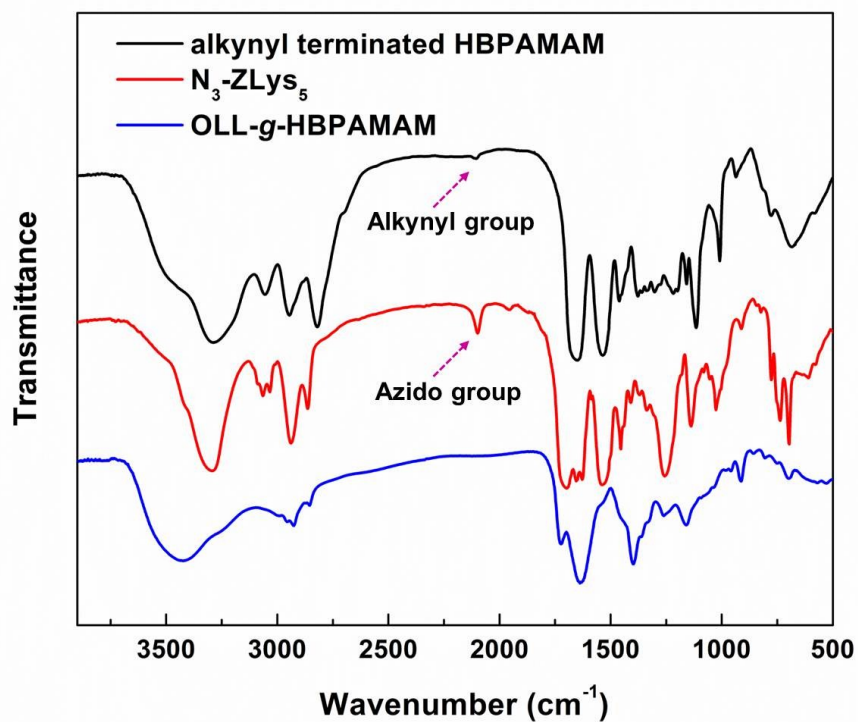

**Figure S2.** FT-IR absorption spectra of alkynyl terminated HBPAMAM, N<sub>3</sub>-ZLys<sub>5</sub> and OLL-g-HBPAMAM.

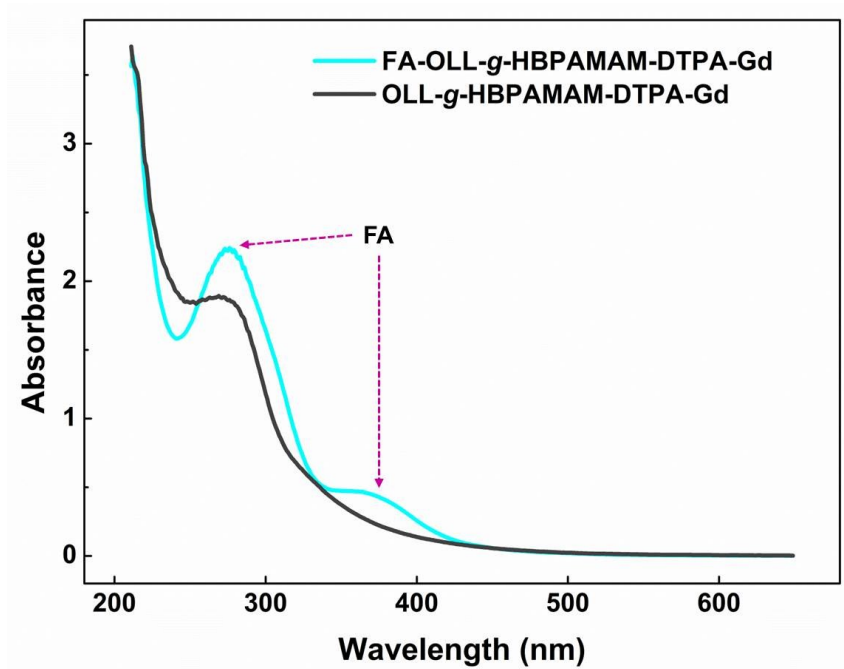

**Figure S3.** UV-vis absorption spectra of OLL-g-HBPAMAM-DTPA-Gd and FA-OLL-g-HBPAMAM-DTPA-Gd.

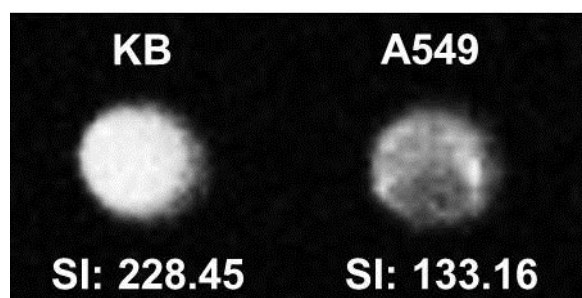

**Figure S4.**  $T_1$ -weighted MR images of KB and A549 cells treated with FA-OLL-g-HBPAMAM-DTPA-Gd. Cells were incubated with sample at a Gd concentration of 0.1 mM for 4 h. Signal intensity (SI) was also given to quantitatively analyze the contrast effect.
